# Supplementary material
Source: Springer Nature journal article supplement (https://www.springermedizin.de/resource/supplementary/12955_2005_213_MOESM2_ESM.pdf/9559914)

PATIENTS

MAP OF ITEMS

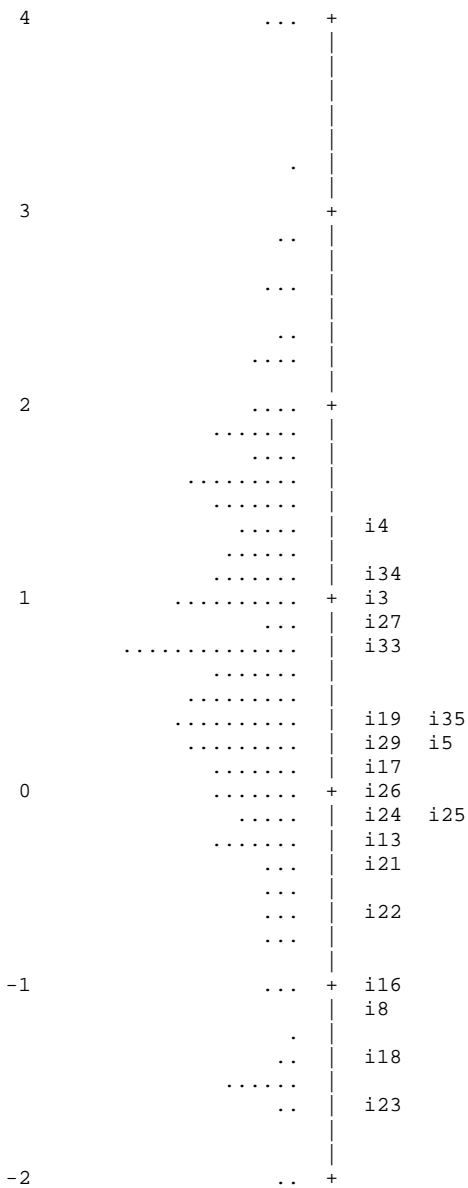

Supplement: MOESM2 [file 9559914]
